# Supplementary material
Source: publisher figshare collection journal article supplement (https://gsapubs.figshare.com/ndownloader/files/25774289)
Supplement: Supplementary file 1 [file 25774289]

## Sheet: S4
Site	Source	Sample name	Type	Depth_m	Density_g_cm3	TiO2_wt_percent *	Ti_ppm	Strain_Ti	Tau_Ti	PFP_Ti	Porosity
Panola Mountain, Georgia, USA	White_et_al_2001		Soil	0.1	2.34	1.91	19100
Panola Mountain, Georgia, USA	White_et_al_2001		Soil	0.3	1.86	1.5	15000
Panola Mountain, Georgia, USA	White_et_al_2001		Soil	0.48	1.86	1.38	13800
Panola Mountain, Georgia, USA	White_et_al_2001		Soil	0.74	1.83	1.07	10700
Panola Mountain, Georgia, USA	White_et_al_2001		Soil	0.84	1.73	1.21	12100
Panola Mountain, Georgia, USA	White_et_al_2001		Soil	1.07	1.81	1.26	12600
Panola Mountain, Georgia, USA	White_et_al_2001		Soil	1.27	1.83	1.16	11600
Panola Mountain, Georgia, USA	White_et_al_2001		Soil	1.52	1.78	1.08	10800
Panola Mountain, Georgia, USA	White_et_al_2001		Saprolite	1.83	1.8	1.2	12000	0.136883	-0.227778	0.289869	0.320755
Panola Mountain, Georgia, USA	White_et_al_2001		Saprolite	2.16	1.72	1.21	12100	0.179928	-0.23416	0.332771	0.350943
Panola Mountain, Georgia, USA	White_et_al_2001		Saprolite	2.51	1.99	1.31	13100	-0.0580127	-0.292621	-0.174917	0.249057
Panola Mountain, Georgia, USA	White_et_al_2001		Saprolite	2.84	2.25	1.33	13300	-0.179393	-0.303258	-1.00909	0.150943
Panola Mountain, Georgia, USA	White_et_al_2001		Saprolite	3.23	1.97	1.49	14900	-0.163402	-0.378076	-0.473385	0.256604
Panola Mountain, Georgia, USA	White_et_al_2001		Saprolite	3.73	2	1.22	12200	0.00642077	-0.240437	0.0197562	0.245283
Panola Mountain, Georgia, USA	White_et_al_2001		Saprolite	3.99	1.98	1.27	12700	-0.0234365	-0.270341	-0.06926	0.25283
Panola Mountain, Georgia, USA	White_et_al_2001		Saprolite	4.29	1.92	1	10000	0.278993	-0.0733333	0.73379	0.275472
Panola Mountain, Georgia, USA	White_et_al_2001		Saprolite	4.52	1.98	1.27	12700	-0.0234365	-0.270341	-0.06926	0.25283
Panola Mountain, Georgia, USA	White_et_al_2001		Saprolite	4.65	2	1.26	12600	-0.0255291	-0.26455	-0.0785511	0.245283
Panola Mountain, Georgia, USA	White_et_al_2001		Saprolite	4.79	1.93	1.08	10800	0.178117	-0.141975	0.477452	0.271698
Panola Mountain, Georgia, USA	White_et_al_2001		Saprolite	6.69	1.83	1.16	11600	0.156805	-0.201149	0.349944	0.309434
Panola Mountain, Georgia, USA	White_et_al_2001		Saprolite	6.99	1.83	1.11	11100	0.208914	-0.165165	0.466235	0.309434
Panola Mountain, Georgia, USA	White_et_al_2001		Saprolite	7.3	1.81	1.22	12200	0.112067	-0.240437	0.241478	0.316981
Panola Mountain, Georgia, USA	White_et_al_2001		Saprolite	7.75	1.83	1.19	11900	0.127642	-0.221289	0.28486	0.309434
Panola Mountain, Georgia, USA	White_et_al_2001		Saprolite	8.66	1.78	1.02	10200	0.352537	-0.0915033	0.721283	0.328302
Panola Mountain, Georgia, USA	White_et_al_2001		Saprolite	9.27	2.25	1.05	10500	0.0394356	-0.11746	0.221825	0.150943
Panola Mountain, Georgia, USA	White_et_al_2001		Saprolite	9.88	2.31	1.02	10200	0.0422149	-0.0915033	0.286813	0.128302
Panola Mountain, Georgia, USA	White_et_al_2001		Rock †	10.18	2.65	0.94	9400
Panola Mountain, Georgia, USA	White_et_al_2001		Rock †	10.34	2.65	0.91	9100
Panola Mountain, Georgia, USA	White_et_al_2001		Rock †	10.49	2.65	0.87	8700
Panola Mountain, Georgia, USA	White_et_al_2001		Rock	10.64	2.65	0.94	9400
Panola Mountain, Georgia, USA	White_et_al_2001		Rock	10.94	2.65	1	10000
Panola Mountain, Georgia, USA	White_et_al_2001		Rock	11.55	2.65	0.9	9000
Panola Mountain, Georgia, USA	White_et_al_2001	Average_bedrock	Rock		2.65	0.926667	9266.67
Panola Mountain, Georgia, USA		Saprolite	mean					0.0748194	-0.212521	0.205048	0.267338
Panola Mountain, Georgia, USA		Saprolite	stdev					0.14321	0.0836085
Panola Mountain, Georgia, USA		Saprolite	stderr					0.0337549	0.0197067	0.0710615	0.0294211
Rio Icacos, Puerto Rico, USA	White_et_al._1998		Regolith	0.254	0.836551	0.431675	4316.75	0.869196	-0.42086	0.390205	0.690166
Rio Icacos, Puerto Rico, USA	White_et_al._1998		Regolith	0.4826	1.08887	0.3892	3892	0.59277	-0.357658	0.400621	0.596714
Rio Icacos, Puerto Rico, USA	White_et_al._1998		Regolith	0.5588	1.15362	0.481398	4813.98	0.215453	-0.480679	0.16073	0.572735
Rio Icacos, Puerto Rico, USA	White_et_al._1998		Regolith	0.762	1.28635	0.389546	3895.46	0.347051	-0.358228	0.315801	0.523573
Rio Icacos, Puerto Rico, USA	White_et_al._1998		Regolith	1.0414	1.3914	0.39806	3980.6	0.218719	-0.371955	0.232557	0.484668
Rio Icacos, Puerto Rico, USA	White_et_al._1998		Regolith	1.3462	1.43191	0.495679	4956.79	-0.0489835	-0.495641	-0.0553114	0.469664
Rio Icacos, Puerto Rico, USA	White_et_al._1998		Regolith	2.032	1.37556	0.392204	3922.04	0.251157	-0.362577	0.260851	0.490534
Rio Icacos, Puerto Rico, USA	White_et_al._1998		Regolith	2.3114	1.33324	0.523411	5234.11	-0.0327176	-0.522364	-0.0319151	0.506208
Rio Icacos, Puerto Rico, USA	White_et_al._1998		Regolith	2.54	1.30113	0.545849	5458.49	-0.0495879	-0.541998	-0.0461229	0.518101
Rio Icacos, Puerto Rico, USA	White_et_al._1998		Regolith	2.5908	1.29471	0.668729	6687.29	-0.220381	-0.626156	-0.203039	0.520479
Rio Icacos, Puerto Rico, USA	White_et_al._1998		Regolith	2.8702	1.26592	0.465884	4658.84	0.144512	-0.463385	0.127566	0.531141
Rio Icacos, Puerto Rico, USA	White_et_al._1998		Regolith	3.2258	1.24845	0.474779	4747.79	0.138782	-0.473439	0.119364	0.537611
Rio Icacos, Puerto Rico, USA	White_et_al._1998		Regolith	3.6322	1.25646	0.476002	4760.02	0.128616	-0.474792	0.111948	0.534644
Rio Icacos, Puerto Rico, USA	White_et_al._1998		Regolith	4.5212	1.34831	0.504028	5040.28	-0.00674906	-0.503996	-0.00673219	0.500626
Rio Icacos, Puerto Rico, USA	White_et_al._1998		Regolith	5.0546	1.41115	0.506404	5064.04	-0.0554356	-0.506323	-0.0606964	0.47735
Rio Icacos, Puerto Rico, USA	White_et_al._1998		Regolith	6.1214	1.41894	0.503448	5034.48	-0.0551044	-0.503425	-0.0610356	0.474466
Rio Icacos, Puerto Rico, USA	White_et_al._1998		Regolith	7.1374	1.22331	0.564453	5644.53	-0.0224469	-0.557093	-0.0185952	0.546923
Rio Icacos, Puerto Rico, USA	White_et_al._1998		Rock	8	2.7	0.25	2500
Rio Icacos, Puerto Rico, USA		Saprolite	mean					0.14205	-0.471798	0.122231	0.537497
Rio Icacos, Puerto Rico, USA		Saprolite	stdev					0.269197	0.0762251
Rio Icacos, Puerto Rico, USA		Saprolite	stderr					0.0652899	0.0184873	0.0439072	0.0310026
Davis Run, Virginia, USA	Pavich_1986	F11-A	Soil	0.6	1.54	1.1	11000
Davis Run, Virginia, USA	Pavich_1986	F11-B	Soil	1.5	1.69	0.79	7900
Davis Run, Virginia, USA	Pavich_1986	F11-C	Saprolite	4.3	1.61	0.33	3300	0.164502	-0.30303	0.24523	0.401487
Davis Run, Virginia, USA	Pavich_1986	F11-D	Saprolite	6.7	1.51	0.34	3400	0.205103	-0.323529	0.262463	0.438662
Davis Run, Virginia, USA	Pavich_1986	F11-E	Saprolite	11	1.69	0.33	3300	0.109378	-0.30303	0.184848	0.371747
Davis Run, Virginia, USA	Pavich_1986	F11-F	Saprolite	15	1.6	0.26	2600	0.48726	-0.115385	0.715243	0.405204
Davis Run, Virginia, USA	Pavich_1986	F11-G	Saprolite	20	2.37	0.24	2400	0.0877286	-0.0416667	0.64974	0.118959
Davis Run, Virginia, USA	Pavich_1986	F11-H	Weathered_granite	21	2.52	0.25	2500
Davis Run, Virginia, USA	Pavich_1986	F11-I	Rock	22	2.69	0.23	2300
Davis Run, Virginia, USA		Saprolite	mean					0.210794	-0.217328	0.385363	0.353588
Davis Run, Virginia, USA		Saprolite	stdev					0.161275	0.161275
Davis Run, Virginia, USA		Saprolite	stderr					0.0721245	0.0579732	0.104866	0.0614426
Crabtree Quarry, North Carolina, USA	Calvert_1980	A	Soil	0.18	0.95	3.82	38200
Crabtree Quarry, North Carolina, USA	Calvert_1980	B2t	Soil	0.67	1.26	2.55	25500
Crabtree Quarry, North Carolina, USA	Calvert_1980	C1-1	Saprolite	1.02	1.32	2.38	23800	-0.159664	-0.579832	-0.159664	0.5
Crabtree Quarry, North Carolina, USA	Calvert_1980	C1-2	Saprolite	1.37	1.39	2.3	23000	-0.174226	-0.565217	-0.193739	0.473485
Crabtree Quarry, North Carolina, USA	Calvert_1980	C1-3	Saprolite	1.82	1.39	2.13	21300	-0.108319	-0.530516	-0.120451	0.473485
Crabtree Quarry, North Carolina, USA	Calvert_1980	C21-1	Saprolite	2.17	1.32	1.7	17000	0.176471	-0.411765	0.176471	0.5
Crabtree Quarry, North Carolina, USA	Calvert_1980	C21-2	Saprolite	2.52	1.32	1.42	14200	0.408451	-0.295775	0.408451	0.5
Crabtree Quarry, North Carolina, USA	Calvert_1980	C21-3	Saprolite	2.87	1.36	1.4	14000	0.386555	-0.285714	0.410714	0.484848
Crabtree Quarry, North Carolina, USA	Calvert_1980	C22-1	Saprolite	3.27	1.35	1.07	10700	0.827622	-0.0654206	0.866116	0.488636
Crabtree Quarry, North Carolina, USA	Calvert_1980	C22-2	Saprolite	3.67	1.35	1.22	12200	0.602914	-0.180328	0.630957	0.488636
Crabtree Quarry, North Carolina, USA	Calvert_1980	C22-3	Saprolite	4.02	1.31	1.7	17000	0.185451	-0.411765	0.182663	0.503788
Crabtree Quarry, North Carolina, USA	Calvert_1980	C22-4	Saprolite	4.37	1.37	1.78	17800	0.0825884	-0.438202	0.0890914	0.481061
Crabtree Quarry, North Carolina, USA	Calvert_1980	IIC3	Saprolite	4.67	1.35	1.6	16000	0.222222	-0.375	0.232558	0.488636
Crabtree Quarry, North Carolina, USA	Calvert_1980	IIIC4-1	Saprolite	4.82	2.04	1.28	12800	0.0110294	-0.21875	0.0375	0.227273
Crabtree Quarry, North Carolina, USA	Calvert_1980	IIIC4-2	Saprolite	4.92	1.53	1.2	12000	0.437908	-0.166667	0.603604	0.420455
Crabtree Quarry, North Carolina, USA	Calvert_1980	IIIC4-3	Saprolite	5.02	1.53	1.13	11300	0.526982	-0.115044	0.726381	0.420455
Crabtree Quarry, North Carolina, USA	Calvert_1980	IIIC4-4	Saprolite	5.12	1.53	1.05	10500	0.643324	-0.047619	0.886744	0.420455
Crabtree Quarry, North Carolina, USA	Calvert_1980	IIIC4-5	Saprolite	5.21	1.53	1	10000	0.72549	0	1	0.420455
Crabtree Quarry, North Carolina, USA	Calvert_1980	R-S	Weathered_granite	5.22	2.46	1.27	12700
Crabtree Quarry, North Carolina, USA	Calvert_1980	R-F	Rock	12	2.59	1	10000
Crabtree Quarry, North Carolina, USA	Calvert_1980	R-U	Rock	12	2.64	1	10000
Crabtree Quarry, North Carolina, USA		Saprolite	mean					0.299675	-0.292976	0.357508	0.455999
Crabtree Quarry, North Carolina, USA		Saprolite	stdev					0.319056	0.319056
Crabtree Quarry, North Carolina, USA		Saprolite	stderr					0.0797641	0.0471061	0.070295	0.0492781
		Sample
	Hewawasam_2013	HA2010 Soil 0-15	Soil	15	1.096	1.158	11580
* For consistency across sites, we use Ti to calculate bulk tau and strain; it is the only immobile reference element common to all studies.
† Classified as "rock" based on density (2.65 g/cm^3) and consistency in Ti and other elements with other samples of "Fresh Granodiorite"

## Sheet: G48191
Riebe, C.S., et al., 2021, Anisovolumetric weathering in granitic saprolite controlled by climate and erosion rates: Geology, v. 49, https://doi.org/10.1130/G48191.1
